# Supplementary material for: Human organoid model of pontocerebellar hypoplasia 2a recapitulates brain region-specific size differences
Source: PubMed Central journal article supplement (PMC11552497; doi:10.1242/dmm.050740), 2024-07-22
Supplement: dmm-17-050740-DataS1.pdf [file dmm-17-050740-DataS1.pdf]

## Karyotype Report

Customer sample ID: iPS-CO-22\_2.1  
Internal sample ID: DE04SCRHIHD100022  
Date of receipt: 2020-02-26

### Gender

Stated: Unknown  
Chr. X derived: Male

Genotype identity with: DESCRHIH00023

## Karyotyping

Technology used: Illumina BeadArray

Product: HumanOmni2.5Exome-8 BeadChip v1.4  
Manifest file: HumanOmni2-5Exome-8v1-4\_A1.bpm  
Cluster file: HumanOmni2-5Exome-8v1-4\_A1.egt

Chip barcode and segment: 203730650093 R02C01

Batch ID and 96 well position: WG6911135-MSA6 B05

Call rate: 0,9976248

### Typing

Scanner: Illumina iScan, S/N: N263  
Site of processing: Life&Brain GENOMICS, Bonn, Germany  
Manufacturer: Illumina, Inc., San Diego, United States of America  
Date of scan: 2020-03-31-1456

### Genotype Analysis

Genome Studio: GenomeStudio V2.0.4  
Genotyping module: Ver. 2.0.4

### Copy Number Analysis

Algorithm applied: CNV-Partition  
Version: 3.2.0  
Software producer: Illumina, Inc., San Diego, United States of America

## Noteworthy findings

No larger chromosomal aberrations to be reported.

## Control Dashboard

| Sample_ID /<br>Sentry_Label            | Category                | Control<br>(BeadType)        | Section 1<br>X | Section 1<br>Y | State      |
|----------------------------------------|-------------------------|------------------------------|----------------|----------------|------------|
| DESCRHIH00022 /<br>203730650093_R02C01 | Staining                | DNP (High)<br>(27630314)     | 20239          | 110            | OK/OK      |
| DESCRHIH00022 /<br>203730650093_R02C01 | Staining                | DNP (Bgnd)<br>(29619375)     | 261            | 211            | OK/OK      |
| DESCRHIH00022 /<br>203730650093_R02C01 | Staining                | Biotin (High)<br>(41666334)  | 287            | 9696           | OK/OK      |
| DESCRHIH00022 /<br>203730650093_R02C01 | Staining                | Biotin (Bgnd)<br>(34648333)  | 220            | 84             | OK/OK      |
| DESCRHIH00022 /<br>203730650093_R02C01 | Extension               | Extension (A)<br>(17616306)  | 17544          | 294            | Notable/OK |
| DESCRHIH00022 /<br>203730650093_R02C01 | Extension               | Extension (T)<br>(14607337)  | 19510          | 257            | Notable/OK |
| DESCRHIH00022 /<br>203730650093_R02C01 | Extension               | Extension (C)<br>(12613307)  | 731            | 10601          | OK/OK      |
| DESCRHIH00022 /<br>203730650093_R02C01 | Extension               | Extension (G)<br>(11603365)  | 821            | 9764           | OK/Notable |
| DESCRHIH00022 /<br>203730650093_R02C01 | Target<br>Removal       | Target Removal<br>(31623323) | 486            | 206            | OK/OK      |
| DESCRHIH00022 /<br>203730650093_R02C01 | Hybridization           | Hyb (High)<br>(19612319)     | 1167           | 10813          | OK/Notable |
| DESCRHIH00022 /<br>203730650093_R02C01 | Hybridization           | Hyb (Medium)<br>(20636378)   | 349            | 6851           | OK/OK      |
| DESCRHIH00022 /<br>203730650093_R02C01 | Hybridization           | Hyb (Low)<br>(23617335)      | 982            | 2204           | OK/OK      |
| DESCRHIH00022 /<br>203730650093_R02C01 | Stringency              | String (PM)<br>(32629312)    | 12362          | 284            | Notable/OK |
| DESCRHIH00022 /<br>203730650093_R02C01 | Stringency              | String (MM)<br>(33668307)    | 2315           | 182            | OK/OK      |
| DESCRHIH00022 /<br>203730650093_R02C01 | Non-Specific<br>Binding | NSB (Bgnd)<br>(26619332)     | 240            | 190            | OK/OK      |
| DESCRHIH00022 /<br>203730650093_R02C01 | Non-Specific<br>Binding | NSB (Bgnd)<br>(27624356)     | 223            | 186            | OK/OK      |
| DESCRHIH00022 /<br>203730650093_R02C01 | Non-Specific<br>Binding | NSB (Bgnd)<br>(25617343)     | 241            | 192            | OK/OK      |
| DESCRHIH00022 /<br>203730650093_R02C01 | Non-Specific<br>Binding | NSB (Bgnd)<br>(24616350)     | 264            | 190            | OK/OK      |
| DESCRHIH00022 /<br>203730650093_R02C01 | Non-<br>Polymorphic     | NP (A)<br>(34633358)         | 6289           | 247            | OK/OK      |
| DESCRHIH00022 /<br>203730650093_R02C01 | Non-<br>Polymorphic     | NP (T)<br>(16648324)         | 8394           | 246            | OK/OK      |
| DESCRHIH00022 /<br>203730650093_R02C01 | Non-<br>Polymorphic     | NP (C)<br>(43641328)         | 448            | 5688           | OK/Notable |
| DESCRHIH00022 /<br>203730650093_R02C01 | Non-<br>Polymorphic     | NP (G)<br>(13642359)         | 472            | 5285           | OK/Notable |
| DESCRHIH00022 /<br>203730650093_R02C01 | Restoration             | Restore<br>(28637363)        | 273            | 212            | OK/OK      |

All „Notable“ tagged probes are within specs. The karyogram can be evaluated.

# Karyogram

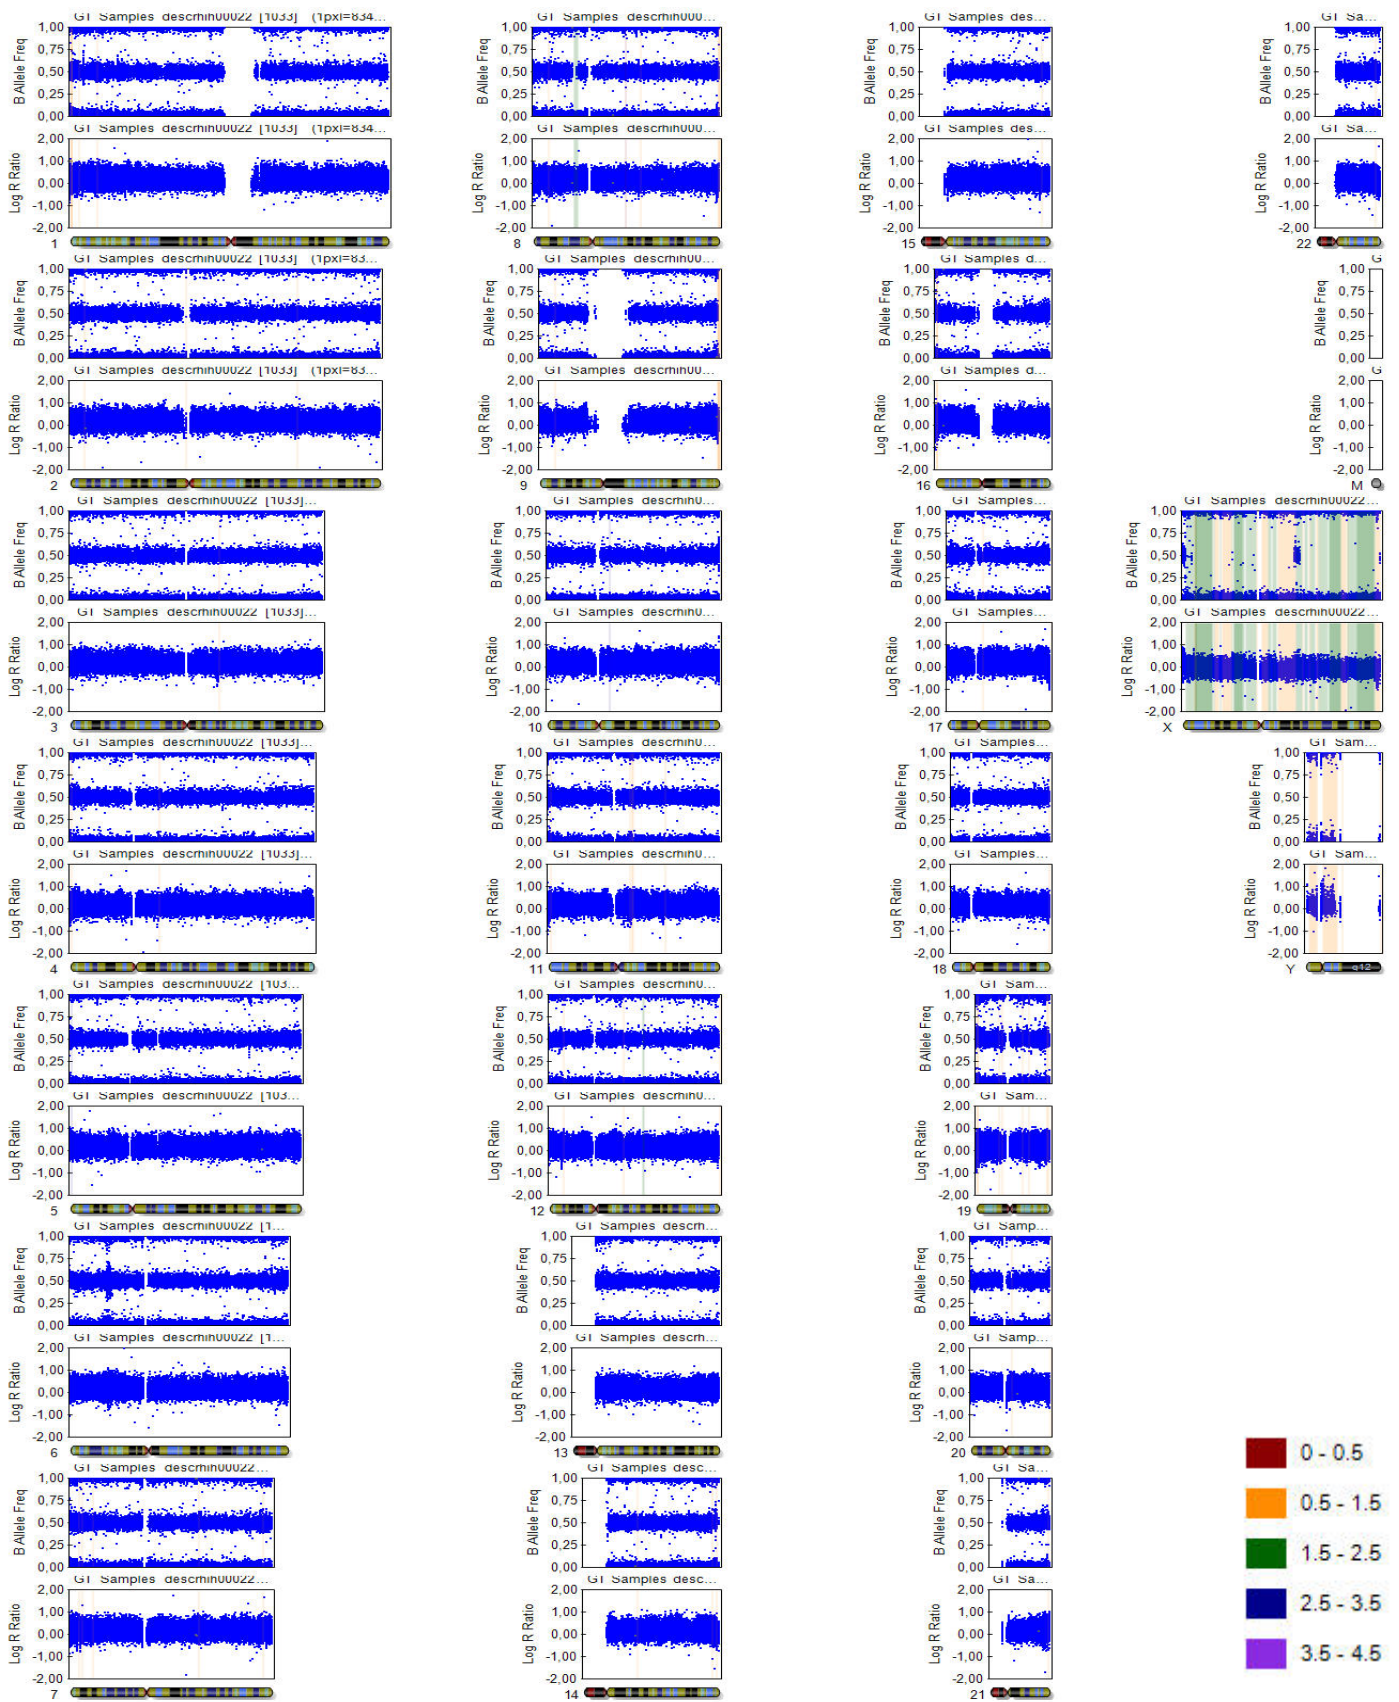

## Copy Number Analysis

Copy number events will be reported if larger than 350'000 base pairs, 1Mbp for loss of heterozygosity regions.

Database of Genomic Variants comparison: Number stated represent population based copy number variants that span the reported event completely.

Copy number analysis

Algorithm applied: CNV-Partition

Version: 3.2

Software producer: Illumina, Inc., San Diego, United States of America

| Sample ID     | Chr | Start    | End      | Type | Length  | Marker count | CN Confidence | DGV Comparison |
|---------------|-----|----------|----------|------|---------|--------------|---------------|----------------|
| DESCRHIH00022 | 8   | 31781189 | 35324420 | 2    | 3543231 | 2334         | 455,1505      |                |
| DESCRHIH00022 | 12  | 72825139 | 74758965 | 2    | 1933826 | 1162         | 235,608       |                |

## Karyotype Report

Customer sample ID: 27\_iPS-CO-57cl.B.1  
Internal sample ID: DE86SCRDZND100143  
Date of receipt: 26.07.2018

### Gender

Stated: Unknown  
Chr. X derived: Male

Genotype identity with: 28\_F-CO-57-2018-07-26 / DESCRDZN00144

## Karyotyping

Technology used: Illumina BeadArray

Product: HumanOmni2.5Exome-8 BeadChip v1.3  
Manifest file: HumanOmni2-5Exome-8v1-3\_A1.bpm  
Cluster file: HumanOmni2-5Exome-8v1-3\_A1.egt

Chip barcode and segment: 201364830139 R03C01

Batch ID and 96 well position: WG6906661-MSA6 C04

Call rate: 0,9981163

### Typing

Scanner: Illumina iScan, S/N: N234  
Site of processing: Life&Brain GENOMICS, Bonn, Germany  
Manufacturer: Illumina, Inc., San Diego, United States of America  
Date of scan: 2018-08-01-2310

### Genotype Analysis

Genome Studio: GenomeStudio V2.0.2  
Genotyping module: Ver. 2.0.2

### Copy Number Analysis

Algorithm applied: CNV-Partition  
Version: 3.2  
Software producer: Illumina, Inc., San Diego, United States of America

## Noteworthy findings

No larger chromosomal aberrations to be reported.



## Control Dashboard

| Sample_ID /<br>Sentrix_Label           | Category                | Control<br>(BeadType)        | Section 1<br>X | Section 1<br>Y | State      |
|----------------------------------------|-------------------------|------------------------------|----------------|----------------|------------|
| DESCRDZN00143 /<br>201364830139_R03C01 | Staining                | DNP (High)<br>(27630314)     | 27305          | 137            | OK/OK      |
| DESCRDZN00143 /<br>201364830139_R03C01 | Staining                | DNP (Bgnd)<br>(29619375)     | 387            | 223            | OK/OK      |
| DESCRDZN00143 /<br>201364830139_R03C01 | Staining                | Biotin (High)<br>(41666334)  | 486            | 12740          | OK/OK      |
| DESCRDZN00143 /<br>201364830139_R03C01 | Staining                | Biotin (Bgnd)<br>(34648333)  | 374            | 100            | OK/OK      |
| DESCRDZN00143 /<br>201364830139_R03C01 | Extension               | Extension (A)<br>(17616306)  | 27672          | 396            | OK/OK      |
| DESCRDZN00143 /<br>201364830139_R03C01 | Extension               | Extension (T)<br>(14607337)  | 30291          | 315            | OK/OK      |
| DESCRDZN00143 /<br>201364830139_R03C01 | Extension               | Extension (C)<br>(12613307)  | 1063           | 13549          | OK/OK      |
| DESCRDZN00143 /<br>201364830139_R03C01 | Extension               | Extension (G)<br>(11603365)  | 1345           | 13010          | OK/OK      |
| DESCRDZN00143 /<br>201364830139_R03C01 | Target<br>Removal       | Target Removal<br>(31623323) | 677            | 179            | OK/OK      |
| DESCRDZN00143 /<br>201364830139_R03C01 | Hybridization           | Hyb (High)<br>(19612319)     | 1329           | 12828          | OK/OK      |
| DESCRDZN00143 /<br>201364830139_R03C01 | Hybridization           | Hyb (Medium)<br>(20636378)   | 550            | 7772           | OK/OK      |
| DESCRDZN00143 /<br>201364830139_R03C01 | Hybridization           | Hyb (Low)<br>(23617335)      | 1251           | 2588           | OK/OK      |
| DESCRDZN00143 /<br>201364830139_R03C01 | Stringency              | String (PM)<br>(32629312)    | 17938          | 361            | OK/OK      |
| DESCRDZN00143 /<br>201364830139_R03C01 | Stringency              | String (MM)<br>(33668307)    | 4743           | 270            | OK/OK      |
| DESCRDZN00143 /<br>201364830139_R03C01 | Non-Specific<br>Binding | NSB (Bgnd)<br>(26619332)     | 365            | 166            | OK/OK      |
| DESCRDZN00143 /<br>201364830139_R03C01 | Non-Specific<br>Binding | NSB (Bgnd)<br>(27624356)     | 350            | 164            | OK/OK      |
| DESCRDZN00143 /<br>201364830139_R03C01 | Non-Specific<br>Binding | NSB (Bgnd)<br>(25617343)     | 347            | 185            | OK/OK      |
| DESCRDZN00143 /<br>201364830139_R03C01 | Non-Specific<br>Binding | NSB (Bgnd)<br>(24616350)     | 380            | 156            | OK/OK      |
| DESCRDZN00143 /<br>201364830139_R03C01 | Non-<br>Polymorphic     | NP (A)<br>(34633358)         | 9101           | 296            | OK/OK      |
| DESCRDZN00143 /<br>201364830139_R03C01 | Non-<br>Polymorphic     | NP (T)<br>(16648324)         | 11388          | 240            | OK/OK      |
| DESCRDZN00143 /<br>201364830139_R03C01 | Non-<br>Polymorphic     | NP (C)<br>(43641328)         | 619            | 6573           | OK/OK      |
| DESCRDZN00143 /<br>201364830139_R03C01 | Non-<br>Polymorphic     | NP (G)<br>(13642359)         | 517            | 5944           | OK/Notable |
| DESCRDZN00143 /<br>201364830139_R03C01 | Restoration             | Restore<br>(28637363)        | 371            | 197            | OK/OK      |

All „Notable“ tagged probes are within specs. The karyogram can be evaluated.

# Karyogram

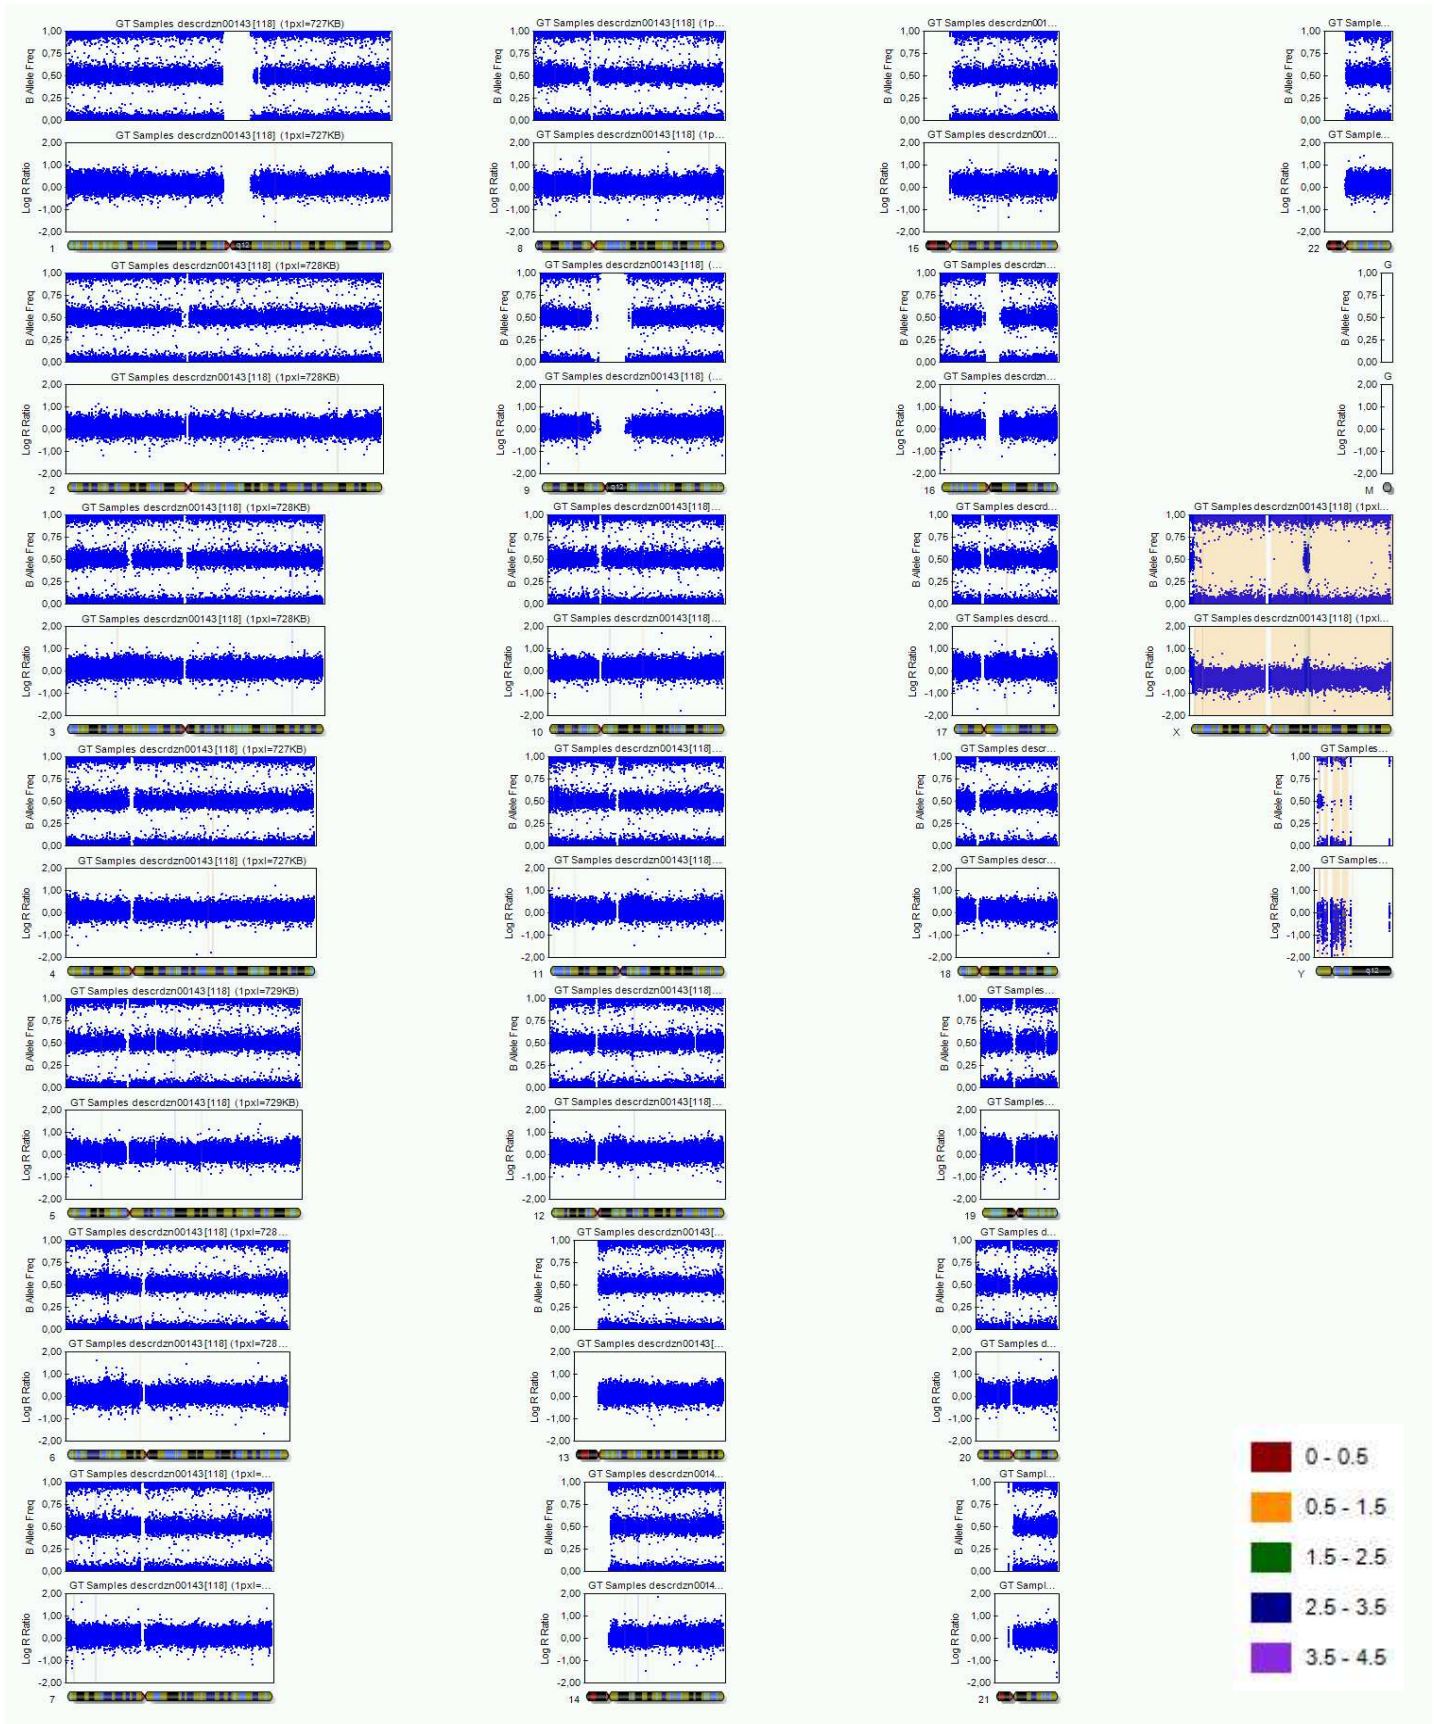

## Copy Number Analysis

Copy number events will be reported if larger than 350'000 base pairs, 1Mbp for loss of heterozygosity regions.

Database of Genomic Variants comparison: Number stated represent population based copy number variants that span the reported event completely.

Copy number analysis

Algorithm applied: CNV-Partition

Version: 3.2

Software producer: Illumina, Inc., San Diego, United States of America

| Sample ID     | Chr | Start    | End      | Type | Length | Marker count | CN Confidence | DGV Comparison |
|---------------|-----|----------|----------|------|--------|--------------|---------------|----------------|
| DESCRDZN00143 | 8   | 43057452 | 43806224 | 3    | 748772 | 361          | 427,1952      |                |



## Karyotype Report

Customer sample ID: iPS-CO-60\_4.3  
Internal sample ID: DE47SCRHIHD100024  
Date of receipt: 2020-02-26

### Gender

Stated: Unknown  
Chr. X derived: Male

Genotype identity with: DESCRHIH00025

## Karyotyping

Technology used: Illumina BeadArray

Product: HumanOmni2.5Exome-8 BeadChip v1.4  
Manifest file: HumanOmni2-5Exome-8v1-4\_A1.bpm  
Cluster file: HumanOmni2-5Exome-8v1-4\_A1.egt

Chip barcode and segment: 203730650093 R04C01

Batch ID and 96 well position: WG6911135-MSA6 D05

Call rate: 0,997606

### Typing

Scanner: Illumina iScan, S/N: N263  
Site of processing: Life&Brain GENOMICS, Bonn, Germany  
Manufacturer: Illumina, Inc., San Diego, United States of America  
Date of scan: 2020-03-31-1503

### Genotype Analysis

Genome Studio: GenomeStudio V2.0.4  
Genotyping module: Ver. 2.0.4

### Copy Number Analysis

Algorithm applied: CNV-Partition  
Version: 3.2.0  
Software producer: Illumina, Inc., San Diego, United States of America

## Noteworthy findings

No larger chromosomal aberrations to be reported.

### Control Dashboard

| Sample_ID /<br>Sentrix_Label           | Category                | Control<br>(BeadType)        | Section 1 X | Section 1 Y | State |
|----------------------------------------|-------------------------|------------------------------|-------------|-------------|-------|
| DESCRHIH00024 /<br>203730650093_R04C01 | Staining                | DNP (High)<br>(27630314)     | 21958       | 137         | OK/OK |
| DESCRHIH00024 /<br>203730650093_R04C01 | Staining                | DNP (Bgnd)<br>(29619375)     | 344         | 203         | OK/OK |
| DESCRHIH00024 /<br>203730650093_R04C01 | Staining                | Biotin (High)<br>(41666334)  | 321         | 12082       | OK/OK |
| DESCRHIH00024 /<br>203730650093_R04C01 | Staining                | Biotin (Bgnd)<br>(34648333)  | 247         | 110         | OK/OK |
| DESCRHIH00024 /<br>203730650093_R04C01 | Extension               | Extension (A)<br>(17616306)  | 20971       | 373         | OK/OK |
| DESCRHIH00024 /<br>203730650093_R04C01 | Extension               | Extension (T)<br>(14607337)  | 23411       | 283         | OK/OK |
| DESCRHIH00024 /<br>203730650093_R04C01 | Extension               | Extension (C)<br>(12613307)  | 878         | 12869       | OK/OK |
| DESCRHIH00024 /<br>203730650093_R04C01 | Extension               | Extension (G)<br>(11603365)  | 959         | 12222       | OK/OK |
| DESCRHIH00024 /<br>203730650093_R04C01 | Target<br>Removal       | Target Removal<br>(31623323) | 598         | 252         | OK/OK |
| DESCRHIH00024 /<br>203730650093_R04C01 | Hybridization           | Hyb (High)<br>(19612319)     | 1366        | 13100       | OK/OK |
| DESCRHIH00024 /<br>203730650093_R04C01 | Hybridization           | Hyb (Medium)<br>(20636378)   | 384         | 8349        | OK/OK |
| DESCRHIH00024 /<br>203730650093_R04C01 | Hybridization           | Hyb (Low)<br>(23617335)      | 1176        | 2737        | OK/OK |
| DESCRHIH00024 /<br>203730650093_R04C01 | Stringency              | String (PM)<br>(32629312)    | 14996       | 379         | OK/OK |
| DESCRHIH00024 /<br>203730650093_R04C01 | Stringency              | String (MM)<br>(33668307)    | 3141        | 269         | OK/OK |
| DESCRHIH00024 /<br>203730650093_R04C01 | Non-Specific<br>Binding | NSB (Bgnd)<br>(26619332)     | 313         | 201         | OK/OK |
| DESCRHIH00024 /<br>203730650093_R04C01 | Non-Specific<br>Binding | NSB (Bgnd)<br>(27624356)     | 324         | 197         | OK/OK |
| DESCRHIH00024 /<br>203730650093_R04C01 | Non-Specific<br>Binding | NSB (Bgnd)<br>(25617343)     | 299         | 228         | OK/OK |
| DESCRHIH00024 /<br>203730650093_R04C01 | Non-Specific<br>Binding | NSB (Bgnd)<br>(24616350)     | 296         | 226         | OK/OK |
| DESCRHIH00024 /<br>203730650093_R04C01 | Non-<br>Polymorphic     | NP (A)<br>(34633358)         | 7804        | 266         | OK/OK |
| DESCRHIH00024 /<br>203730650093_R04C01 | Non-<br>Polymorphic     | NP (T)<br>(16648324)         | 9916        | 297         | OK/OK |
| DESCRHIH00024 /<br>203730650093_R04C01 | Non-<br>Polymorphic     | NP (C)<br>(43641328)         | 522         | 7149        | OK/OK |
| DESCRHIH00024 /<br>203730650093_R04C01 | Non-<br>Polymorphic     | NP (G)<br>(13642359)         | 537         | 6188        | OK/OK |
| DESCRHIH00024 /<br>203730650093_R04C01 | Restoration             | Restore<br>(28637363)        | 363         | 206         | OK/OK |

All probes are within specs. The karyogram can be evaluated.

# Karyogram

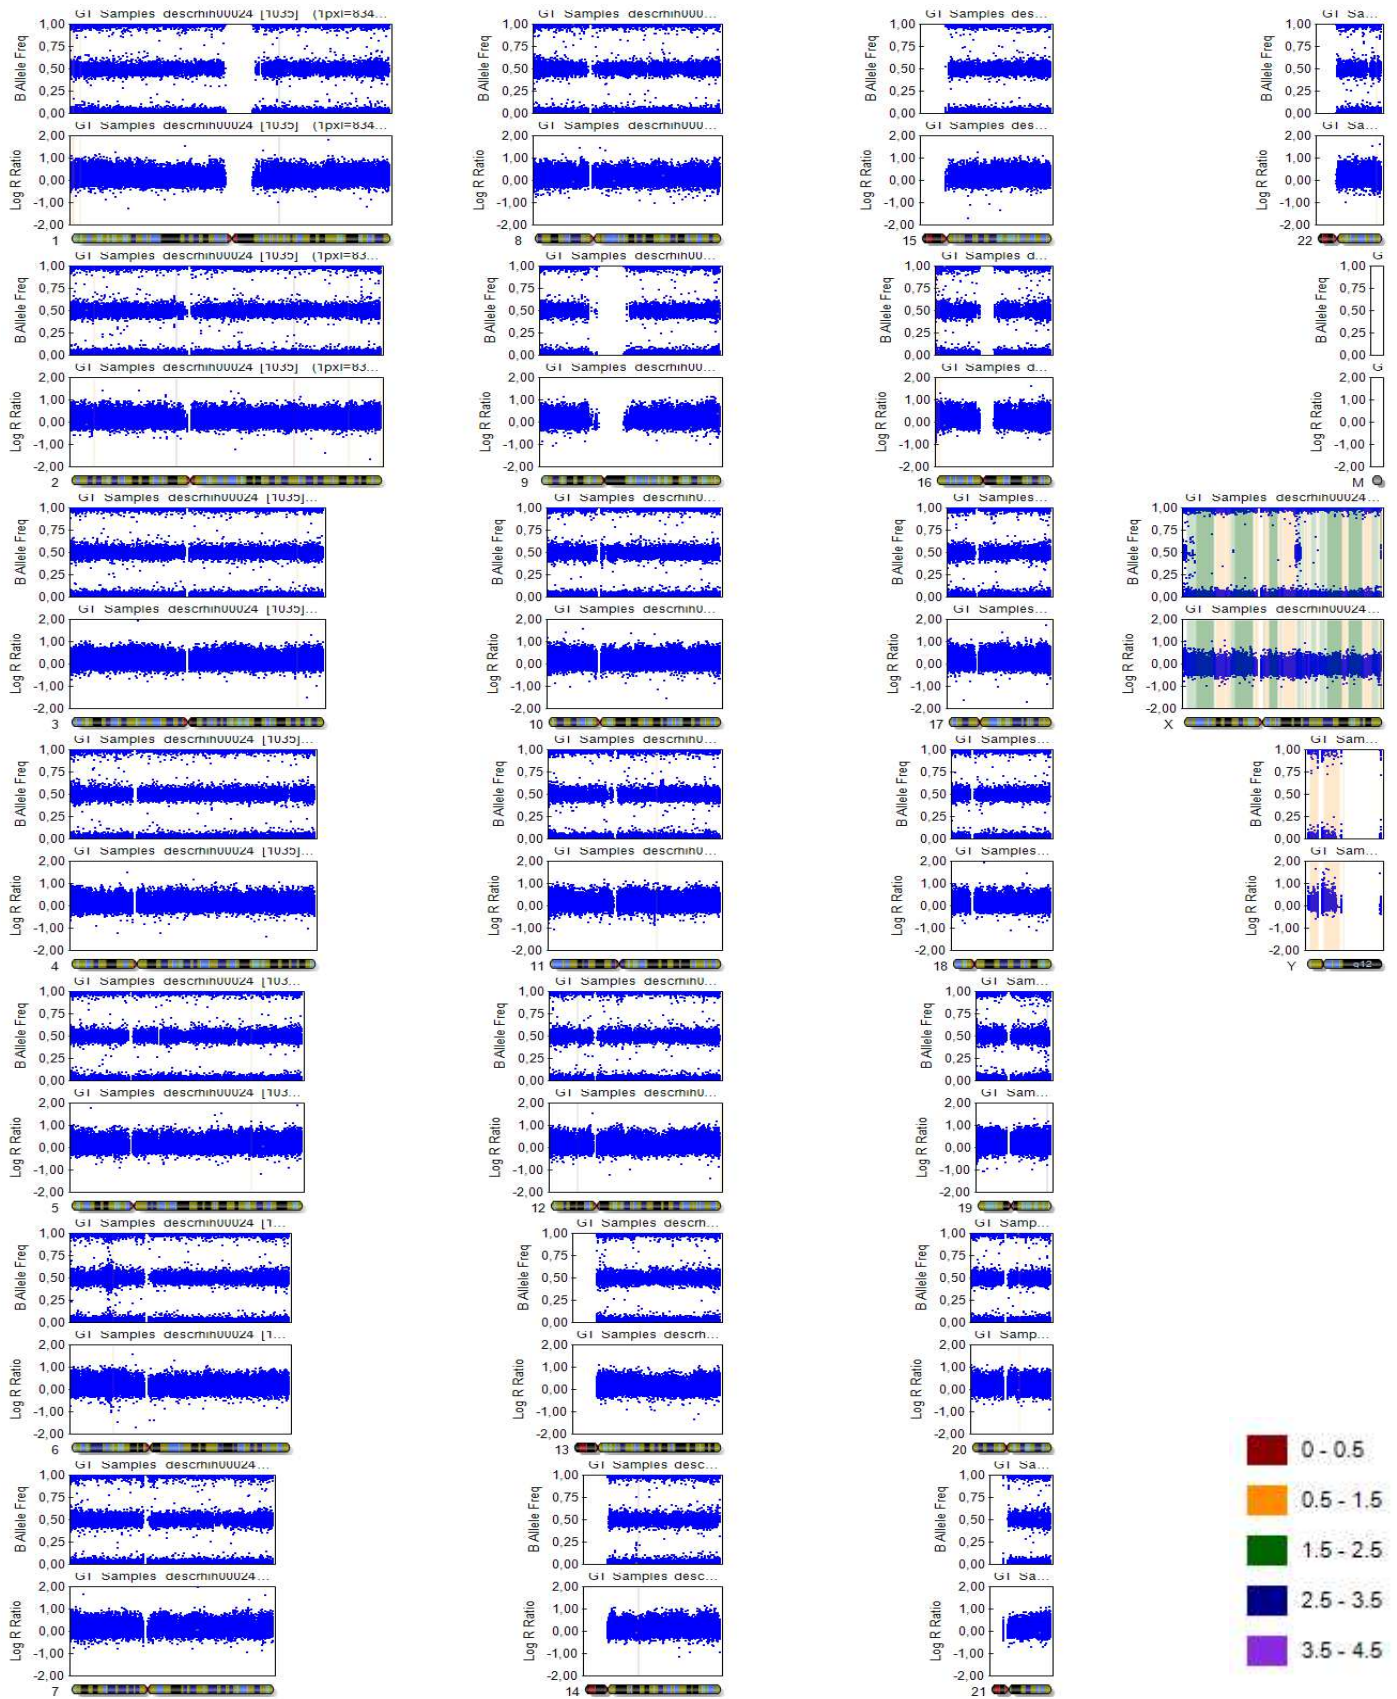

## Copy Number Analysis

Copy number events will be reported if larger than 350'000 base pairs, 1Mbp for loss of heterozygosity regions.

Database of Genomic Variants comparison: Number stated represent population based copy number variants that span the reported event completely.

Copy number analysis

Algorithm applied: CNV-Partition

Version: 3.2

Software producer: Illumina, Inc., San Diego, United States of America

| Sample ID     | Chr | Start    | End       | Type | Length   | Marker count | CN Confidence | DGV Comparison                  |
|---------------|-----|----------|-----------|------|----------|--------------|---------------|---------------------------------|
| DESCRHIH00024 | 12  | 20522796 | 21680693  | 2    | 1157897  | 1493         | 342,3974      |                                 |
| DESCRHIH00024 | 23  | 2700157  | 24993887  | 2    | 22293730 | 11958        | 1481,305      |                                 |
| DESCRHIH00024 | 23  | 25000842 | 33074340  | 1    | 8073498  | 4676         | 676,9131      |                                 |
| DESCRHIH00024 | 23  | 33112111 | 37029338  | 1    | 3917227  | 1767         | 289,3273      |                                 |
| DESCRHIH00024 | 23  | 37033484 | 54733713  | 2    | 17700229 | 7686         | 1490,719      |                                 |
| DESCRHIH00024 | 23  | 54736227 | 58563509  | 1    | 3827282  | 990          | 70,9988       |                                 |
| DESCRHIH00024 | 23  | 61686465 | 62573853  | 1    | 887388   | 185          | 146,1671      |                                 |
| DESCRHIH00024 | 23  | 63400883 | 67085251  | 1    | 3684368  | 976          | 271,2258      | CNV-Gain: 1, OTHER-Inversion: 2 |
| DESCRHIH00024 | 23  | 67097144 | 74027649  | 2    | 6930505  | 2957         | 2351,022      |                                 |
| DESCRHIH00024 | 23  | 74031648 | 76230687  | 1    | 2199039  | 618          | 66,9812       |                                 |
| DESCRHIH00024 | 23  | 76237943 | 77787620  | 2    | 1549677  | 293          | 678,5046      |                                 |
| DESCRHIH00024 | 23  | 77804801 | 88440097  | 1    | 10635296 | 4446         | 1318,529      |                                 |
| DESCRHIH00024 | 23  | 88442047 | 92374313  | 2    | 3932266  | 1160         | 248,2036      |                                 |
| DESCRHIH00024 | 23  | 92547980 | 94025957  | 2    | 1477977  | 831          | 1801,044      |                                 |
| DESCRHIH00024 | 23  | 94027807 | 95538643  | 1    | 1510836  | 738          | 313,9972      |                                 |
| DESCRHIH00024 | 23  | 95544051 | 97068109  | 2    | 1524058  | 763          | 1833,992      |                                 |
| DESCRHIH00024 | 23  | 97074770 | 99554768  | 1    | 2479998  | 903          | 165,7551      |                                 |
| DESCRHIH00024 | 23  | 99557421 | 104463794 | 2    | 4906373  | 1423         | 3124,86       |                                 |



|               |    |           |           |   |          |      |          |                               |
|---------------|----|-----------|-----------|---|----------|------|----------|-------------------------------|
| DESCRHIH00024 | 23 | 104464069 | 106109204 | 1 | 1645135  | 428  | 164,2652 |                               |
| DESCRHIH00024 | 23 | 106112751 | 111616869 | 2 | 5504118  | 1301 | 963,7    |                               |
| DESCRHIH00024 | 23 | 111650324 | 123584863 | 2 | 11934539 | 2763 | 1477,011 |                               |
| DESCRHIH00024 | 23 | 123588245 | 128397152 | 1 | 4808907  | 897  | 251,0483 |                               |
| DESCRHIH00024 | 23 | 128398819 | 140002446 | 2 | 11603627 | 2758 | 1564,544 |                               |
| DESCRHIH00024 | 23 | 140010139 | 147122830 | 1 | 7112691  | 1731 | 612,3635 |                               |
| DESCRHIH00024 | 23 | 147158718 | 152213311 | 2 | 5054593  | 1464 | 1059,053 |                               |
| DESCRHIH00024 | 23 | 152222116 | 153282028 | 1 | 1059912  | 385  | 427,3397 |                               |
| DESCRHIH00024 | 23 | 153698458 | 154916845 | 2 | 1218387  | 380  | 825,4448 | CNV-Gain: 1, CNV-Gain+Loss: 1 |
| DESCRHIH00024 | 24 | 2657176   | 10082095  | 1 | 7424919  | 728  | 3551,399 |                               |
| DESCRHIH00024 | 24 | 13133499  | 24891486  | 1 | 11757987 | 1499 | 7184,58  |                               |

## Karyotype Report

Customer sample ID: iPS-PCH-01\_3.1\_p11  
Internal sample ID: DE34SCRDZND100206  
Date of receipt: 2021-03-09

### Gender

Stated: Unstated  
Chr. X derived: Male

Genotype identity with: F-PCH-01\_P3-2021-03-09 / DESCRDZN00202,  
IPS-PCH-01\_2.1\_P11-2021-03-09 / DESCRDZN00205

## Karyotyping

Technology used: Illumina BeadArray

Product: HumanOmni2.5Exome-8 BeadChip v1.5  
Manifest file: InfiniumOmni2-5Exome-8v1-5\_A1.bpm  
Cluster file: InfiniumOmni2-5Exome-8v1-5\_A1-Cluster-File.egt

Chip barcode and segment: 204372050103 R07C01

Batch ID and 96 well position: WG6917121-MSA6 G02

Call rate: 0,9986958

### Typing

Scanner: Illumina iScan, S/N: N234  
Site of processing: Life&Brain GENOMICS, Bonn, Germany  
Manufacturer: Illumina, Inc., San Diego, United States of America  
Date of scan: 2021-03-17-1200

### Genotype Analysis

Genome Studio: GenomeStudio V2.0.5  
Genotyping module: Ver. 2.0.5

### Copy Number Analysis

Algorithm applied: CNV-Partition  
Version: 3.2.0  
Software producer: Illumina, Inc., San Diego, United States of America

## Noteworthy findings

No larger chromosomal aberrations to be reported.

## Control Dashboard

| Sample_ID /<br>Sentry_Label            | Category                | Control<br>(BeadType)        | Section<br>1 X | Section 1<br>Y | State               |
|----------------------------------------|-------------------------|------------------------------|----------------|----------------|---------------------|
| DESCRDZN00206 /<br>204372050103_R07C01 | Staining                | DNP (High)<br>(27630314)     | 37630          | 369            | OK/OK               |
| DESCRDZN00206 /<br>204372050103_R07C01 | Staining                | DNP (Bgnd)<br>(43603326)     | 710            | 450            | Notable/<br>Notable |
| DESCRDZN00206 /<br>204372050103_R07C01 | Staining                | Biotin (High)<br>(41666334)  | 792            | 20828          | OK/OK               |
| DESCRDZN00206 /<br>204372050103_R07C01 | Staining                | Biotin (Bgnd)<br>(34648333)  | 582            | 355            | Notable/OK          |
| DESCRDZN00206 /<br>204372050103_R07C01 | Extension               | Extension (A)<br>(17616306)  | 36574          | 466            | OK/OK               |
| DESCRDZN00206 /<br>204372050103_R07C01 | Extension               | Extension (T)<br>(14607337)  | 37520          | 410            | OK/OK               |
| DESCRDZN00206 /<br>204372050103_R07C01 | Extension               | Extension (C)<br>(12613307)  | 1845           | 21676          | OK/OK               |
| DESCRDZN00206 /<br>204372050103_R07C01 | Extension               | Extension (G)<br>(11603365)  | 2118           | 21803          | Notable/OK          |
| DESCRDZN00206 /<br>204372050103_R07C01 | Target<br>Removal       | Target Removal<br>(31623323) | 1220           | 256            | OK/OK               |
| DESCRDZN00206 /<br>204372050103_R07C01 | Hybridization           | Hyb (High)<br>(19612319)     | 1778           | 22924          | OK/OK               |
| DESCRDZN00206 /<br>204372050103_R07C01 | Hybridization           | Hyb (Medium)<br>(20636378)   | 771            | 15775          | OK/OK               |
| DESCRDZN00206 /<br>204372050103_R07C01 | Hybridization           | Hyb (Low)<br>(23617335)      | 1949           | 4464           | OK/OK               |
| DESCRDZN00206 /<br>204372050103_R07C01 | Stringency              | String (PM)<br>(32629312)    | 26788          | 516            | OK/OK               |
| DESCRDZN00206 /<br>204372050103_R07C01 | Stringency              | String (MM)<br>(33668307)    | 9148           | 380            | Notable/OK          |
| DESCRDZN00206 /<br>204372050103_R07C01 | Non-Specific<br>Binding | NSB (Bgnd)<br>(28637363)     | 528            | 370            | OK/OK               |
| DESCRDZN00206 /<br>204372050103_R07C01 | Non-Specific<br>Binding | NSB (Bgnd)<br>(27624356)     | 596            | 283            | OK/OK               |
| DESCRDZN00206 /<br>204372050103_R07C01 | Non-Specific<br>Binding | NSB (Bgnd)<br>(25617343)     | 1828           | 287            | OK/OK               |
| DESCRDZN00206 /<br>204372050103_R07C01 | Non-Specific<br>Binding | NSB (Bgnd)<br>(24616350)     | 558            | 1113           | OK/OK               |
| DESCRDZN00206 /<br>204372050103_R07C01 | Non-<br>Polymorphic     | NP(A)<br>(34633358)          | 13152          | 391            | OK/OK               |
| DESCRDZN00206 /<br>204372050103_R07C01 | Non-<br>Polymorphic     | NP(T)<br>(16648324)          | 19273          | 444            | OK/OK               |
| DESCRDZN00206 /<br>204372050103_R07C01 | Non-<br>Polymorphic     | NP(C)<br>(43641328)          | 901            | 11699          | OK/OK               |
| DESCRDZN00206 /<br>204372050103_R07C01 | Non-<br>Polymorphic     | NP(G)<br>(13642359)          | 932            | 11048          | OK/OK               |

All „Notable“ tagged probes are within specs. The karyogram can be evaluated.

# Karyogram

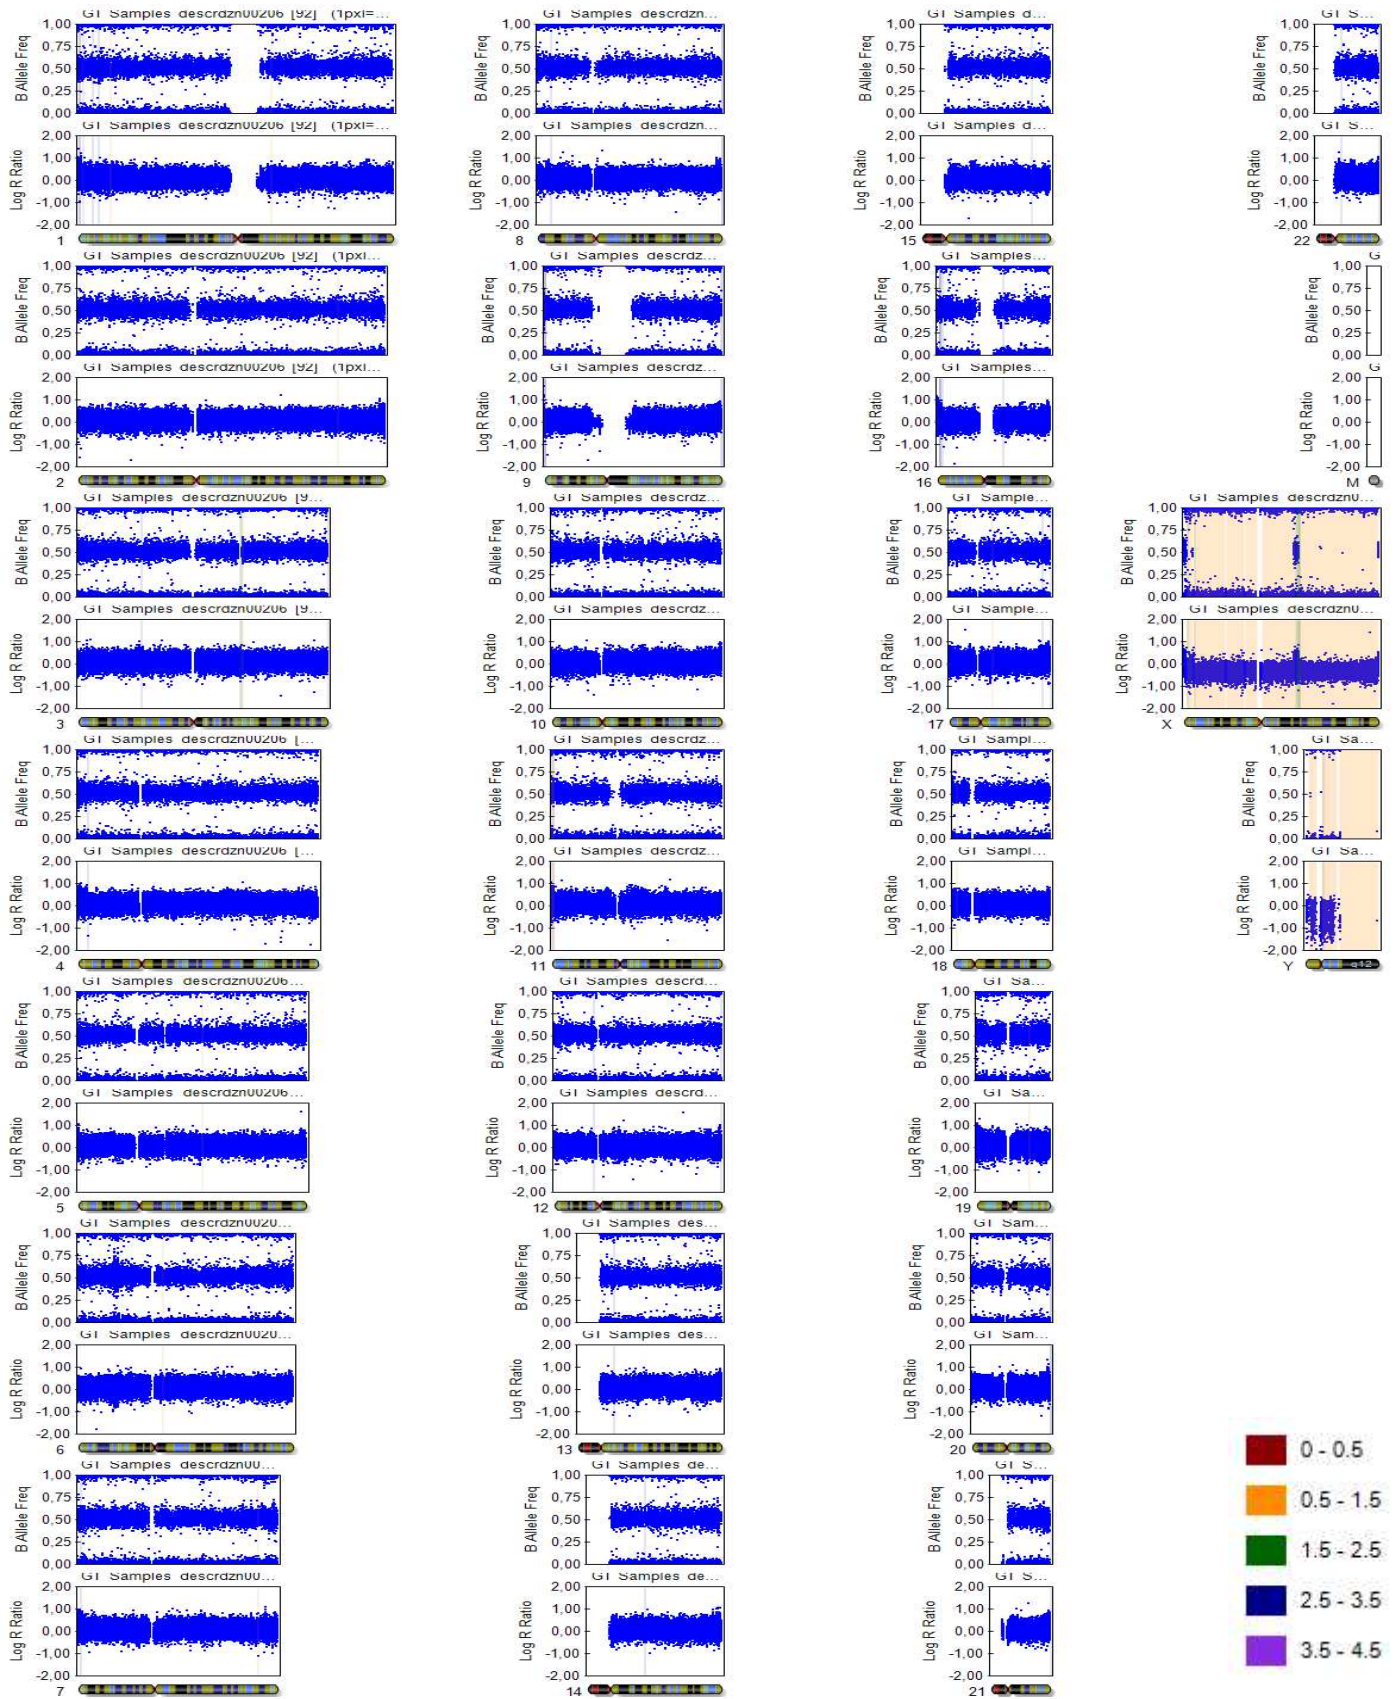



## Copy Number Analysis

Copy number events will be reported if larger than 350'000 base pairs, 1Mbp for loss of heterozygosity regions.

Database of Genomic Variants comparison: Number stated represent population based copy number variants that span the reported event completely.

Copy number analysis

Algorithm applied: CNV-Partition

Version: 3.2

Software producer: Illumina, Inc., San Diego, United States of America

| Sample ID     | Chr | Start     | End       | Type | Length  | Marker count | CN Confidence | DGV Comparison |
|---------------|-----|-----------|-----------|------|---------|--------------|---------------|----------------|
| DESCRDZN00206 | 3   | 127465894 | 129762545 | 2    | 2296651 | 1816         | 283,233       |                |

## Karyotype Report

Customer sample ID: iPS-PCH-02\_1.7\_p10  
Internal sample ID: DE07SCRDZND100207  
Date of receipt: 2021-03-09

### Gender

Stated: Unstated  
Chr. X derived: Male

Genotype identity with: F-PCH-02\_P5-2021-03-09 / DESCRDZN00203,  
IPS-PCH-02\_4.1\_P11-2021-03-09 / DESCRDZN00208

## Karyotyping

Technology used: Illumina BeadArray

Product: HumanOmni2.5Exome-8 BeadChip v1.5  
Manifest file: InfiniumOmni2-5Exome-8v1-5\_A1.bpm  
Cluster file: InfiniumOmni2-5Exome-8v1-5\_A1-Cluster-File.egt

Chip barcode and segment: 204372050103 R08C01

Batch ID and 96 well position: WG6917121-MSA6 H02

Call rate: 0,9970004

### Typing

Scanner: Illumina iScan, S/N: N234  
Site of processing: Life&Brain GENOMICS, Bonn, Germany  
Manufacturer: Illumina, Inc., San Diego, United States of America  
Date of scan: 2021-03-17-1200

### Genotype Analysis

Genome Studio: GenomeStudio V2.0.5  
Genotyping module: Ver. 2.0.5

### Copy Number Analysis

Algorithm applied: CNV-Partition  
Version: 3.2.0  
Software producer: Illumina, Inc., San Diego, United States of America

## Noteworthy findings

No larger chromosomal aberrations to be reported.

## Control Dashboard

| Sample_ID /<br>Sentry_Label            | Category                | Control<br>(BeadType)        | Section 1<br>X | Section 1<br>Y | State               |
|----------------------------------------|-------------------------|------------------------------|----------------|----------------|---------------------|
| DESCRDZN00207 /<br>204372050103_R08C01 | Staining                | DNP (High)<br>(27630314)     | 43484          | 373            | OK/OK               |
| DESCRDZN00207 /<br>204372050103_R08C01 | Staining                | DNP (Bgnd)<br>(43603326)     | 813            | 392            | Notable/<br>Notable |
| DESCRDZN00207 /<br>204372050103_R08C01 | Staining                | Biotin (High)<br>(41666334)  | 1013           | 24996          | Notable/OK          |
| DESCRDZN00207 /<br>204372050103_R08C01 | Staining                | Biotin (Bgnd)<br>(34648333)  | 743            | 362            | Notable/OK          |
| DESCRDZN00207 /<br>204372050103_R08C01 | Extension               | Extension (A)<br>(17616306)  | 39698          | 614            | OK/OK               |
| DESCRDZN00207 /<br>204372050103_R08C01 | Extension               | Extension (T)<br>(14607337)  | 40283          | 498            | OK/OK               |
| DESCRDZN00207 /<br>204372050103_R08C01 | Extension               | Extension (C)<br>(12613307)  | 1959           | 25122          | OK/OK               |
| DESCRDZN00207 /<br>204372050103_R08C01 | Extension               | Extension (G)<br>(11603365)  | 2321           | 25291          | Notable/OK          |
| DESCRDZN00207 /<br>204372050103_R08C01 | Target<br>Removal       | Target Removal<br>(31623323) | 1360           | 398            | OK/OK               |
| DESCRDZN00207 /<br>204372050103_R08C01 | Hybridization           | Hyb (High)<br>(19612319)     | 1643           | 25731          | OK/OK               |
| DESCRDZN00207 /<br>204372050103_R08C01 | Hybridization           | Hyb (Medium)<br>(20636378)   | 876            | 17961          | OK/OK               |
| DESCRDZN00207 /<br>204372050103_R08C01 | Hybridization           | Hyb (Low)<br>(23617335)      | 1879           | 4195           | OK/OK               |
| DESCRDZN00207 /<br>204372050103_R08C01 | Stringency              | String (PM)<br>(32629312)    | 28809          | 621            | OK/OK               |
| DESCRDZN00207 /<br>204372050103_R08C01 | Stringency              | String (MM)<br>(33668307)    | 6714           | 417            | Notable/OK          |
| DESCRDZN00207 /<br>204372050103_R08C01 | Non-Specific<br>Binding | NSB (Bgnd)<br>(28637363)     | 719            | 402            | Notable/OK          |
| DESCRDZN00207 /<br>204372050103_R08C01 | Non-Specific<br>Binding | NSB (Bgnd)<br>(27624356)     | 691            | 344            | OK/OK               |
| DESCRDZN00207 /<br>204372050103_R08C01 | Non-Specific<br>Binding | NSB (Bgnd)<br>(25617343)     | 661            | 380            | OK/OK               |
| DESCRDZN00207 /<br>204372050103_R08C01 | Non-Specific<br>Binding | NSB (Bgnd)<br>(24616350)     | 699            | 357            | OK/OK               |
| DESCRDZN00207 /<br>204372050103_R08C01 | Non-<br>Polymorphic     | NP(A)<br>(34633358)          | 12123          | 492            | OK/OK               |
| DESCRDZN00207 /<br>204372050103_R08C01 | Non-<br>Polymorphic     | NP(T)<br>(16648324)          | 19309          | 448            | OK/OK               |
| DESCRDZN00207 /<br>204372050103_R08C01 | Non-<br>Polymorphic     | NP(C)<br>(43641328)          | 951            | 13059          | OK/OK               |
| DESCRDZN00207 /<br>204372050103_R08C01 | Non-<br>Polymorphic     | NP(G)<br>(13642359)          | 961            | 12365          | OK/OK               |

All „Notable“ tagged probes are within specs. The karyogram can be evaluated.

# Karyogram

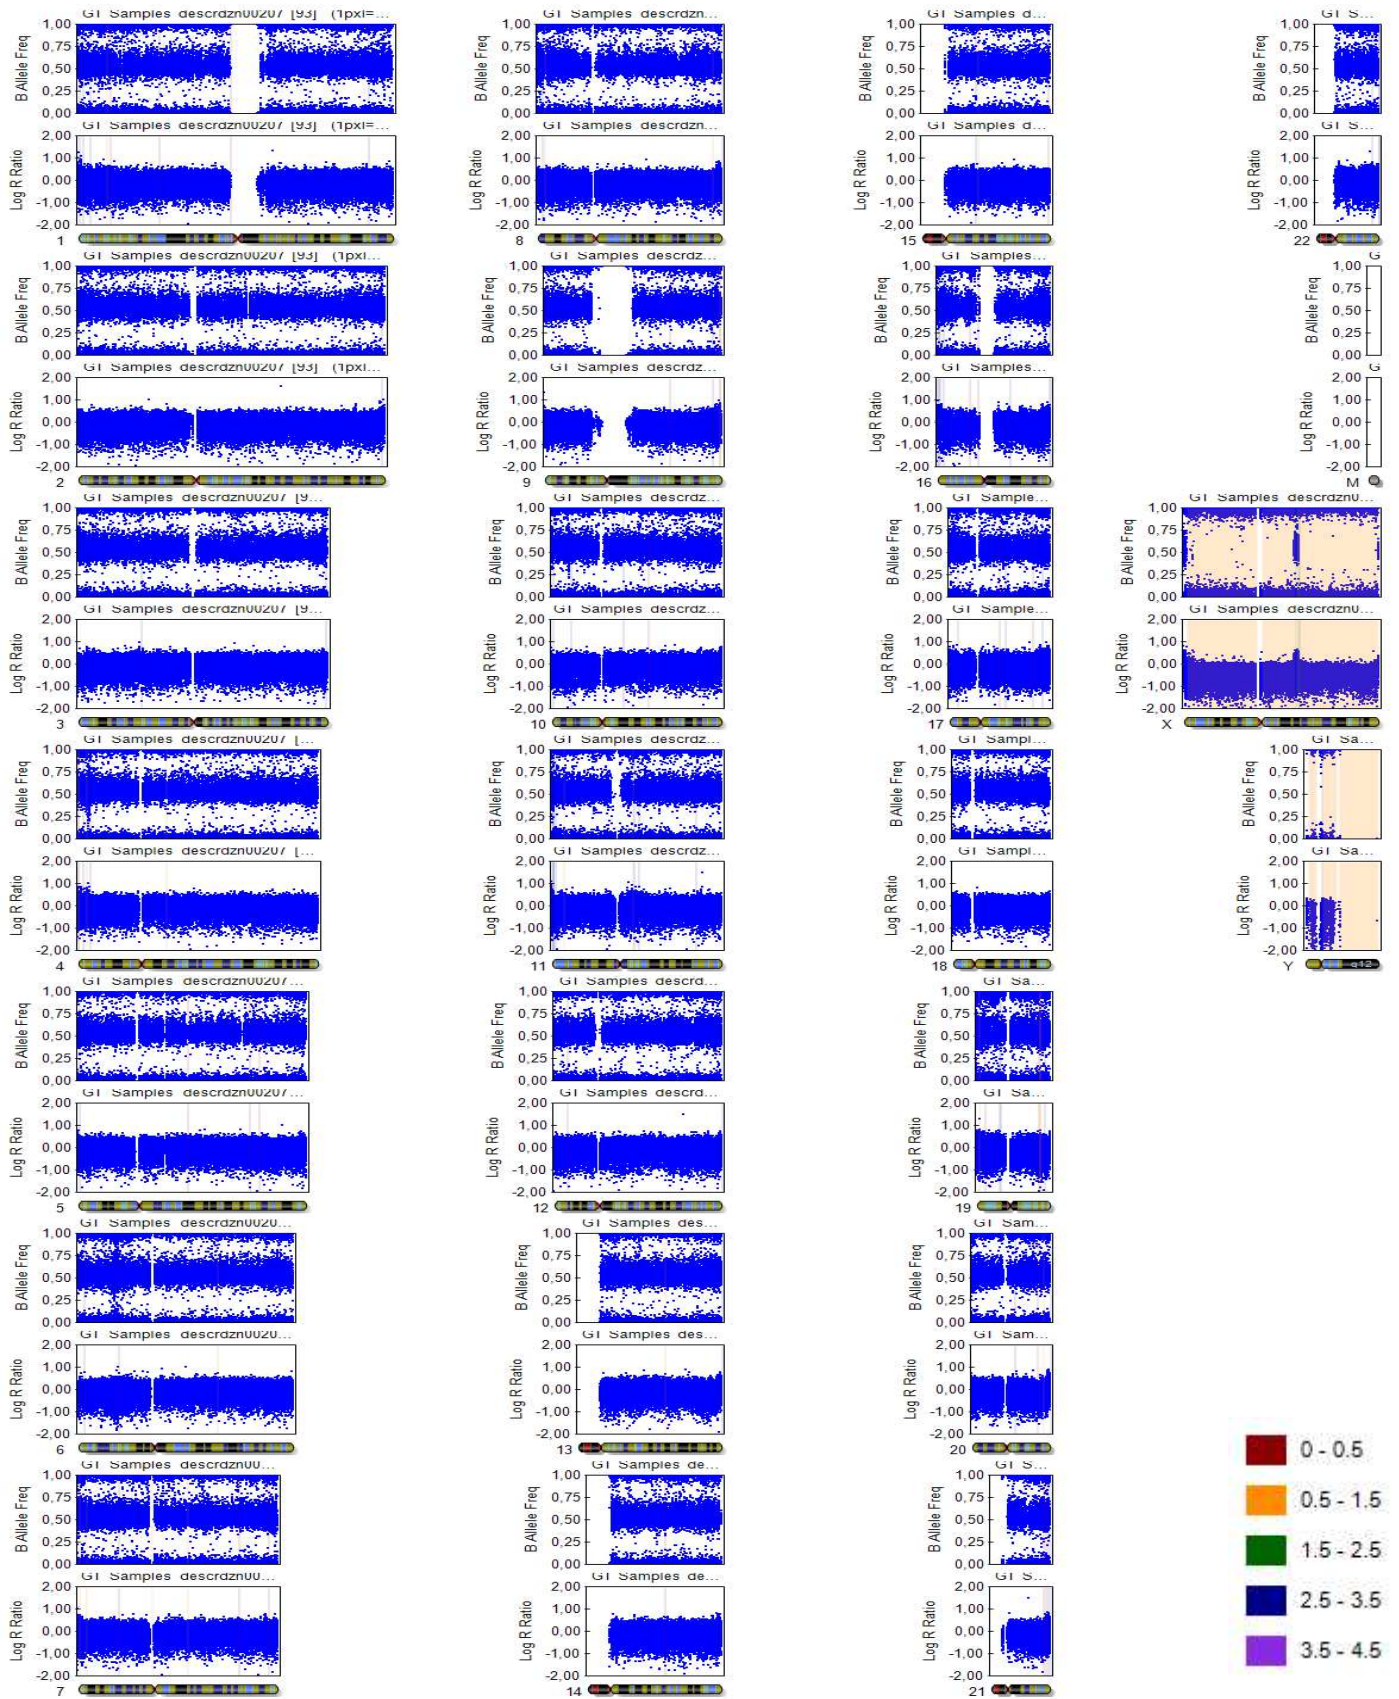



## Copy Number Analysis

Copy number events will be reported if larger than 350'000 base pairs, 1Mbp for loss of heterozygosity regions.

Database of Genomic Variants comparison: Number stated represent population based copy number variants that span the reported event completely.

Copy number analysis

Algorithm applied: CNV-Partition

Version: 3.2

Software producer: Illumina, Inc., San Diego, United States of America

| Sample ID     | Chr | Start   | End      | Type | Length | Marker count | CN Confidence | DGV Comparison |
|---------------|-----|---------|----------|------|--------|--------------|---------------|----------------|
| DESCRDZN00207 | 4   | 9558683 | 10407505 | 3    | 848822 | 710          | 2740,706      |                |

## Karyotype Report

Customer sample ID: iPS-PCH-03\_4.2\_p10  
Internal sample ID: DE50SCRDZND100209  
Date of receipt: 2021-03-09

### Gender

Stated: Unstated  
Chr. X derived: Male

Genotype identity with: F-PCH-03\_P2-2021-03-09 / DESCRDZN00204,  
IPS-PCH-03\_6.1\_P11-2021-03-09 / DESCRDZN00210

## Karyotyping

Technology used: Illumina BeadArray

Product: HumanOmni2.5Exome-8 BeadChip v1.5  
Manifest file: InfiniumOmni2-5Exome-8v1-5\_A1.bpm  
Cluster file: InfiniumOmni2-5Exome-8v1-5\_A1-Cluster-File.egt

Chip barcode and segment: 204372060010 R02C01

Batch ID and 96 well position: WG6917121-MSA6 B03

Call rate: 0,9982454

### Typing

Scanner: Illumina iScan, S/N: N234  
Site of processing: Life&Brain GENOMICS, Bonn, Germany  
Manufacturer: Illumina, Inc., San Diego, United States of America  
Date of scan: 2021-03-17-1200

### Genotype Analysis

Genome Studio: GenomeStudio V2.0.5  
Genotyping module: Ver. 2.0.5

### Copy Number Analysis

Algorithm applied: CNV-Partition  
Version: 3.2.0  
Software producer: Illumina, Inc., San Diego, United States of America

## Noteworthy findings

No larger chromosomal aberrations to be reported.

## Control Dashboard

| Sample_ID /<br>Sentry_Label            | Category                | Control<br>(BeadType)        | Section 1 X | Section 1 Y | State               |
|----------------------------------------|-------------------------|------------------------------|-------------|-------------|---------------------|
| DESCRDZN00209 /<br>204372060010_R02C01 | Staining                | DNP (High)<br>(27630314)     | 30251       | 86          | OK/OK               |
| DESCRDZN00209 /<br>204372060010_R02C01 | Staining                | DNP (Bgnd)<br>(43603326)     | 339         | 156         | Notable/<br>Notable |
| DESCRDZN00209 /<br>204372060010_R02C01 | Staining                | Biotin (High)<br>(41666334)  | 465         | 11921       | OK/OK               |
| DESCRDZN00209 /<br>204372060010_R02C01 | Staining                | Biotin (Bgnd)<br>(34648333)  | 363         | 141         | OK/OK               |
| DESCRDZN00209 /<br>204372060010_R02C01 | Extension               | Extension (A)<br>(17616306)  | 26250       | 248         | OK/OK               |
| DESCRDZN00209 /<br>204372060010_R02C01 | Extension               | Extension (T)<br>(14607337)  | 27511       | 254         | OK/OK               |
| DESCRDZN00209 /<br>204372060010_R02C01 | Extension               | Extension (C)<br>(12613307)  | 1074        | 12240       | OK/OK               |
| DESCRDZN00209 /<br>204372060010_R02C01 | Extension               | Extension (G)<br>(11603365)  | 1331        | 11312       | OK/OK               |
| DESCRDZN00209 /<br>204372060010_R02C01 | Target<br>Removal       | Target Removal<br>(31623323) | 643         | 156         | OK/OK               |
| DESCRDZN00209 /<br>204372060010_R02C01 | Hybridization           | Hyb (High)<br>(19612319)     | 1131        | 12010       | OK/OK               |
| DESCRDZN00209 /<br>204372060010_R02C01 | Hybridization           | Hyb (Medium)<br>(20636378)   | 414         | 8273        | OK/OK               |
| DESCRDZN00209 /<br>204372060010_R02C01 | Hybridization           | Hyb (Low)<br>(23617335)      | 998         | 2530        | OK/OK               |
| DESCRDZN00209 /<br>204372060010_R02C01 | Stringency              | String (PM)<br>(32629312)    | 18022       | 296         | OK/OK               |
| DESCRDZN00209 /<br>204372060010_R02C01 | Stringency              | String (MM)<br>(33668307)    | 5625        | 182         | OK/OK               |
| DESCRDZN00209 /<br>204372060010_R02C01 | Non-Specific<br>Binding | NSB (Bgnd)<br>(28637363)     | 358         | 156         | OK/OK               |
| DESCRDZN00209 /<br>204372060010_R02C01 | Non-Specific<br>Binding | NSB (Bgnd)<br>(27624356)     | 336         | 162         | OK/OK               |
| DESCRDZN00209 /<br>204372060010_R02C01 | Non-Specific<br>Binding | NSB (Bgnd)<br>(25617343)     | 347         | 184         | OK/OK               |
| DESCRDZN00209 /<br>204372060010_R02C01 | Non-Specific<br>Binding | NSB (Bgnd)<br>(24616350)     | 286         | 178         | OK/OK               |
| DESCRDZN00209 /<br>204372060010_R02C01 | Non-<br>Polymorphic     | NP(A)<br>(34633358)          | 8841        | 256         | OK/OK               |
| DESCRDZN00209 /<br>204372060010_R02C01 | Non-<br>Polymorphic     | NP(T)<br>(16648324)          | 12595       | 230         | OK/OK               |
| DESCRDZN00209 /<br>204372060010_R02C01 | Non-<br>Polymorphic     | NP(C)<br>(43641328)          | 549         | 6457        | OK/OK               |
| DESCRDZN00209 /<br>204372060010_R02C01 | Non-<br>Polymorphic     | NP(G)<br>(13642359)          | 644         | 6025        | OK/OK               |

All „Notable“ tagged probes are within specs. The karyogram can be evaluated.

# Karyogram

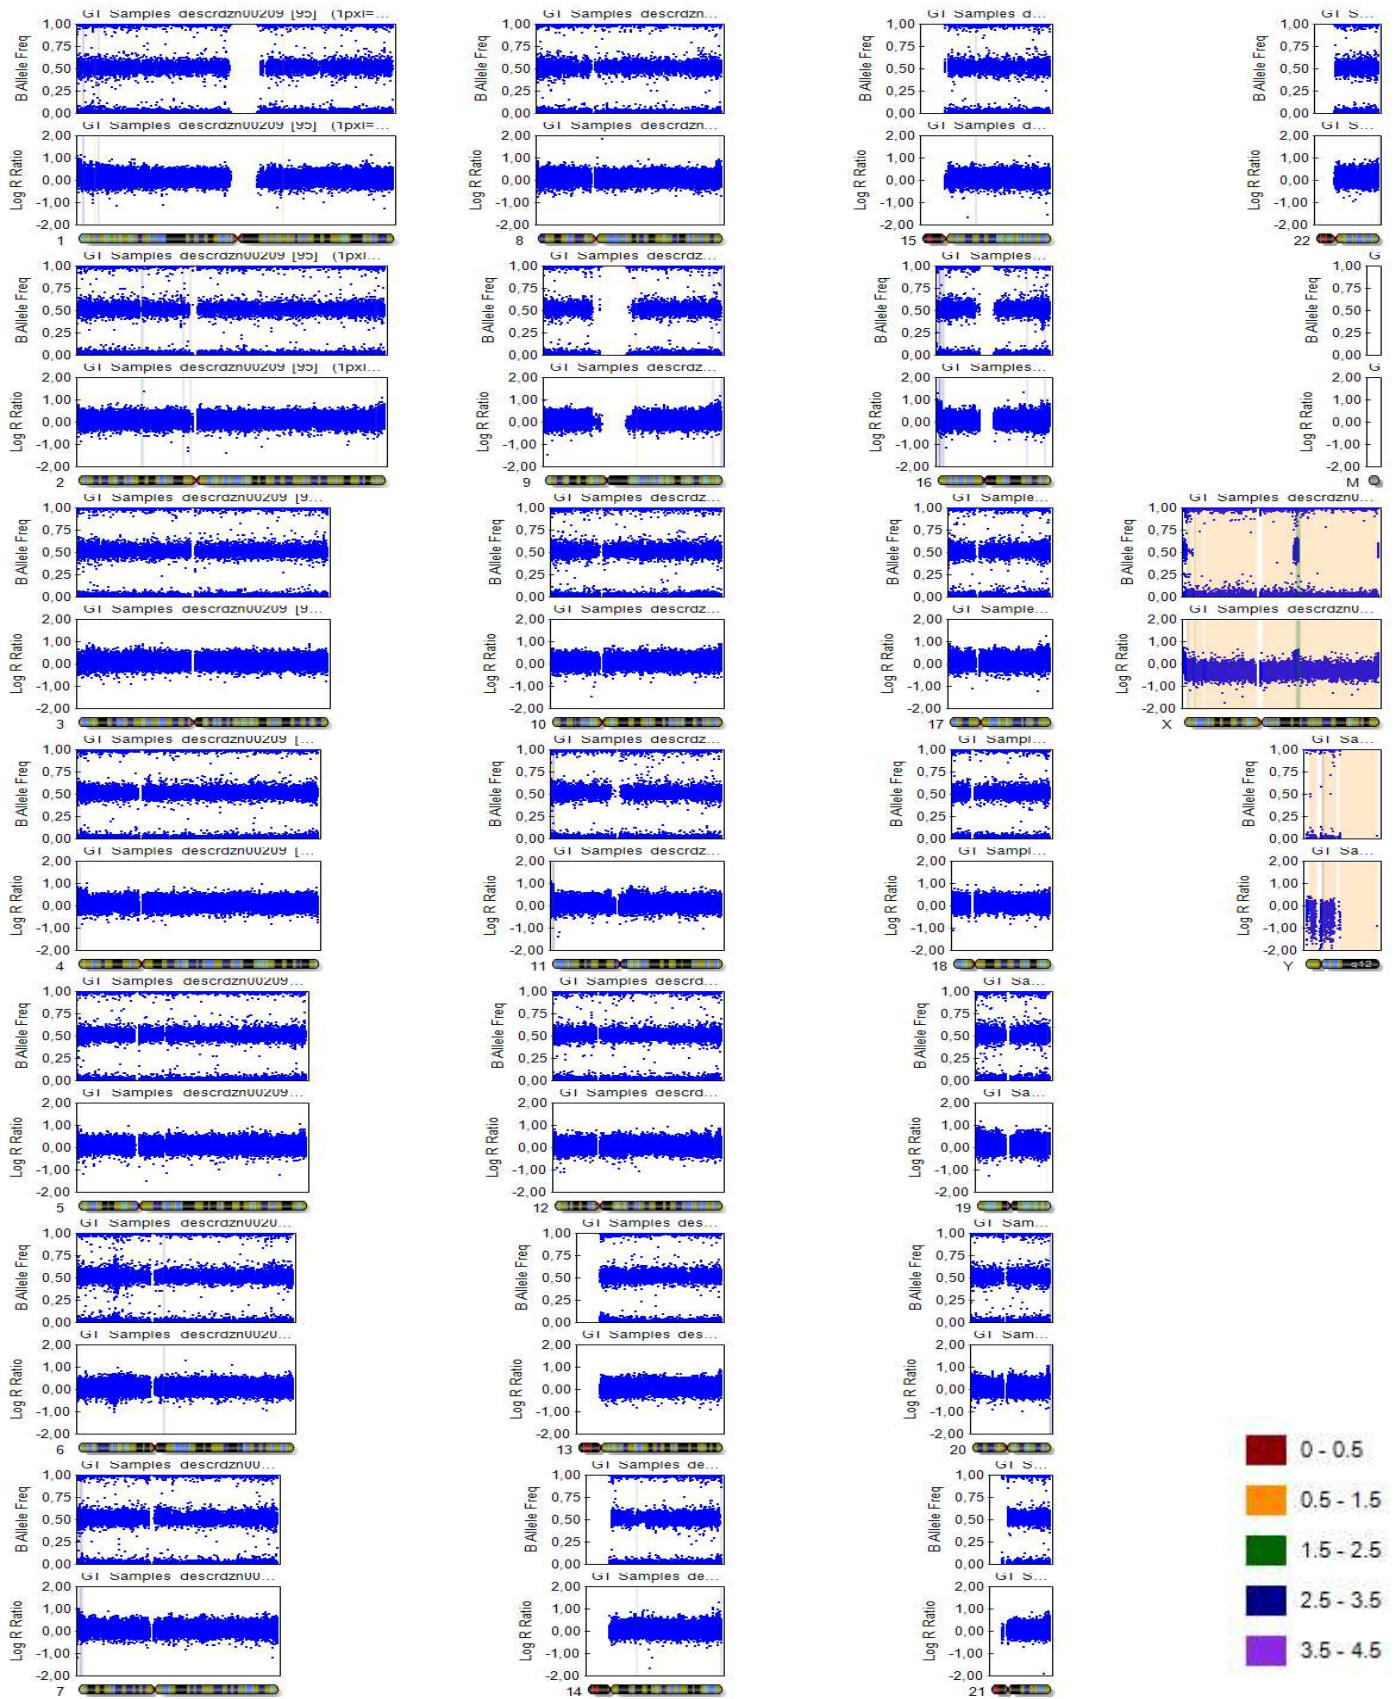



## Copy Number Analysis

Copy number events will be reported if larger than 350'000 base pairs, 1Mbp for loss of heterozygosity regions.

Database of Genomic Variants comparison: Number stated represent population based copy number variants that span the reported event completely.

Copy number analysis

Algorithm applied: CNV-Partition

Version: 3.2

Software producer: Illumina, Inc., San Diego, United States of America

| Sample ID     | Chr | Start    | End      | Type | Length  | Marker count | CN Confidence | DGV Comparison |
|---------------|-----|----------|----------|------|---------|--------------|---------------|----------------|
| DESCRDZN00209 | 2   | 49977093 | 52048553 | 2    | 2071460 | 1910         | 481,6987      |                |
| DESCRDZN00209 | 14  | 38487404 | 40341185 | 2    | 1853781 | 1534         | 333,2639      |                |
